# Supplementary material
Source: Springer Nature journal article supplement (https://www.springermedizin.de/resource/supplementary/12911_2009_332_MOESM9_ESM.pdf/9525496)
Supplement: MOESM9 [file 9525496]

```
if (Treatment([diet, oral_antidiabetic], status = PRESCRIBED) and (patient.HbA1c <= 6.5) and
(not Treatment([diet, metformin], status = CURRENT_OR_PAST, failed = True)) and
(not Treatment([diet, agi      ], status = CURRENT_OR_PAST, failed = True)) and
(not Treatment([diet, metformin], status = PRESCRIBED)) and
(not Treatment([diet, agi      ], status = PRESCRIBED))):
    criticism("Sulfonamides, glinides and glitazones are not recommended at this stage of the disease.
Guideline recommends metformin as first-line treatment.
(Traitement médicamenteux du diabète de type 2)")
```

```
if (Treatment([diet, oral_antidiabetic], status = PRESCRIBED) and (patient.A1C <= 6.5) and
( Treatment([diet, metformin], status = CURRENT_OR_PAST, failed = True) or
 Treatment([diet, agi      ], status = CURRENT_OR_PAST, failed = True)) and
(not Treatment([diet, metformin], status = PRESCRIBED)) and
(not Treatment([diet, agi      ], status = PRESCRIBED))):
    criticism("Sulfonamides, glinides and glitazones are not recommended at this stage of the disease.
Guideline recommends metformin as first-line treatment, and AGI as second-line.
(Traitement médicamenteux du diabète de type 2)")
```

```
if (Treatment([diet, oral_antidiabetic], status = PRESCRIBED) and (patient.A1C <= 6.5) and
(not Treatment([diet, metformin], status = CURRENT_OR_PAST, failed = True)) and
(not Treatment([diet, agi      ], status = CURRENT_OR_PAST, failed = True)) and
(not Treatment([diet, metformin], status = PRESCRIBED)) and
( Treatment([diet, agi      ], status = PRESCRIBED))):
    criticism("AGI should be prescribed only as second-line treatment.
Guideline recommends metformin as first-line treatment
(Traitement médicamenteux du diabète de type 2)")
```
